# Supplementary material for: Progression and Dissemination of Pulmonary Mycobacterium Avium Infection in a Susceptible Immunocompetent Mouse Model
Source: Int J Mol Sci. 2022 May 26;23(11):5999. doi: 10.3390/ijms23115999 (PMC9181083; doi:10.3390/ijms23115999)
Supplement: Supplementary file 1 [file ijms-23-05999-s001.zip › Supplemental Tables S1-S6 merged.pdf]

| Supplemental Table S1. Pulmonary Histopathology Ordinal Score Summary<br>(intranasal inoculation) |           |         |               |          |     |
|---------------------------------------------------------------------------------------------------|-----------|---------|---------------|----------|-----|
| Weeks post-infection (wpi) and inoculation dosage                                                 | Animal ID | Slide # | Ordinal Score | strain   | sex |
| 4 wpi 10 <sup>6</sup>                                                                             | C1-1      | 1       | 0             | B6.Sst1S | F   |
|                                                                                                   |           | 4       | 1             |          |     |
|                                                                                                   |           | 7       | 1             |          |     |
|                                                                                                   | C1-2      | 1       | 1             | B6.Sst1S | F   |
|                                                                                                   |           | 4       | 1             |          |     |
|                                                                                                   |           | 7       | 1             |          |     |
|                                                                                                   | C1-3      | 1       | 0             | B6.Sst1S | M   |
|                                                                                                   |           | 4       | 1             |          |     |
|                                                                                                   |           | 7       | 1             |          |     |
|                                                                                                   | C5-1      | 1       | 0             | B6.Sst1S | M   |
|                                                                                                   |           | 4       | 0             |          |     |
|                                                                                                   |           | 7       | 0             |          |     |
|                                                                                                   | C5-2      | 1       | 1             | B6.Sst1S | M   |
|                                                                                                   |           | 4       | 1             |          |     |
|                                                                                                   |           | 7       | 1             |          |     |
|                                                                                                   | C5-3      | 1       | 1             | B6.Sst1S | M   |
|                                                                                                   |           | 4       | 2             |          |     |
| 8 wpi 10 <sup>6</sup>                                                                             | 4-1       | 7       | 2             | B6.Sst1S | M   |
|                                                                                                   |           | 1       | 1             |          |     |
|                                                                                                   |           | 4       | 2             |          |     |
|                                                                                                   | 4-2       | 4       | 2             | B6.Sst1S | M   |
|                                                                                                   |           | 7       | 2             |          |     |
|                                                                                                   |           | 1       | 2             |          |     |
| 10 wpi 10 <sup>6</sup>                                                                            | 2-1       | 1       | 2             | B6.Sst1S | F   |
|                                                                                                   |           | 4       | 2             |          |     |
|                                                                                                   |           | 7       | 2             |          |     |
|                                                                                                   | 2-2       | 1       | 1             | B6.Sst1S | F   |
|                                                                                                   |           | 4       | 2             |          |     |
|                                                                                                   |           | 7       | 2             |          |     |
|                                                                                                   | 3-1       | 1       | 2             | B6.Sst1S | F   |
|                                                                                                   |           | 4       | 2             |          |     |

|                           |      |   |   |          |   |
|---------------------------|------|---|---|----------|---|
|                           |      | 7 | 2 |          |   |
| 12 wpi<br>10 <sup>6</sup> | 3-2  | 1 | 2 | B6.Sst1S | F |
|                           |      | 4 | 2 |          |   |
|                           |      | 7 | 2 |          |   |
|                           | 3-3  | 1 | 2 | B6.Sst1S | F |
|                           |      | 4 | 2 |          |   |
|                           |      | 7 | 2 |          |   |
|                           | 3-4  | 1 | 2 | B6.Sst1S | F |
|                           |      | 4 | 2 |          |   |
|                           |      | 7 | 2 |          |   |
|                           | 14-2 | 1 | 2 | B6.Sst1S | F |
|                           |      | 4 | 3 |          |   |
|                           |      | 7 | 2 |          |   |
|                           | 14-3 | 1 | 2 | B6.Sst1S | F |
|                           |      | 4 | 2 |          |   |
|                           |      | 7 | 2 |          |   |

| Supplemental Table S2. Ordinal Grading Score: <i>Mycobacterium avium</i> intranasal and intrabronchiolar inoculation |                                                                                                                                                                                                                                                                                                      |
|----------------------------------------------------------------------------------------------------------------------|------------------------------------------------------------------------------------------------------------------------------------------------------------------------------------------------------------------------------------------------------------------------------------------------------|
| 0                                                                                                                    | No significant findings observed.                                                                                                                                                                                                                                                                    |
| 1                                                                                                                    | Multifocal lymphohistiocytic perivascular and peribronchiolar inflammation; minimal granulomatous pneumonia(<10% parenchyma).                                                                                                                                                                        |
| 2                                                                                                                    | Multifocal lymphohistiocytic perivascular and peribronchiolar inflammation; mild-to-moderate granulomatous pneumonia with rare intralesional single cell necrosis and neutrophils (>10-30% parenchyma).                                                                                              |
| 3                                                                                                                    | Multifocal lymphohistiocytic perivascular and peribronchiolar inflammation; moderate-to-marked granulomatous pneumonia with mild intralesional single cell necrosis and neutrophilic infiltrate, sporadic multinucleated macrophages) and mild intralesional pulmonary fibrosis (>30-50% parenchyma) |

| Supplemental Table S3. Pulmonary Histopathology Ordinal Score Summary<br>(Left mainstream intrabronchial inoculation) |
|-----------------------------------------------------------------------------------------------------------------------|
|-----------------------------------------------------------------------------------------------------------------------|

| Weeks Post-Infection (wpi) and inoculation dosage | Animal ID | Depth of Block (mm from ventral surface) | Strain       | Left lung (inoculation site) | Right lungs (un-inoculated) |
|---------------------------------------------------|-----------|------------------------------------------|--------------|------------------------------|-----------------------------|
| 12 wpi 10 <sup>5</sup>                            | 1         | 1                                        | WT           | 2                            | 2                           |
|                                                   |           | 2                                        |              | 2                            | 2                           |
|                                                   | 2         | 1                                        |              | 1                            | 1                           |
|                                                   |           | 2                                        |              | 1                            | 1                           |
|                                                   | 3         | 1                                        |              | 1                            | 1                           |
|                                                   |           | 2                                        |              | 1                            | 1                           |
|                                                   | 4         | 1                                        |              | 2                            | 1                           |
|                                                   |           | 2                                        |              | 2                            | 1                           |
|                                                   | 13        | 1                                        | B6.Sst1<br>S | 2                            | 2                           |
|                                                   |           | 2                                        |              | 2                            | 2                           |
|                                                   | 14        | 1                                        |              | 1                            | 0                           |
|                                                   |           | 2                                        |              | 1                            | 1                           |
|                                                   | 15        | 1                                        |              | 0                            | 0                           |
|                                                   |           | 2                                        |              | 0                            | 0                           |
| 16 wpi 10 <sup>5</sup>                            | 5         | 1                                        | WT           | 3                            | 2                           |
|                                                   |           | 2                                        |              | 3                            | 2                           |
|                                                   | 6         | 1                                        |              | 3                            | 2                           |
|                                                   |           | 2                                        |              | 3                            | 2                           |
|                                                   | 7         | 1                                        |              | 2                            | 2                           |
|                                                   |           | 2                                        |              | 2                            | 1                           |
|                                                   | 8         | 1                                        |              | 2                            | 2                           |
|                                                   |           | 2                                        |              | 2                            | 2                           |
|                                                   | 16        | 1                                        | B6.Sst1<br>S | 3                            | 3                           |
|                                                   |           | 2                                        |              | 3                            | 3                           |
|                                                   | 17        | 1                                        |              | 3                            | 2                           |
|                                                   |           | 2                                        |              | 3                            | 2                           |
|                                                   | 18        | 1                                        |              | 0                            | 0                           |

|                        |    |   |              |   |   |
|------------------------|----|---|--------------|---|---|
|                        | 19 | 2 |              | 0 | 0 |
|                        |    | 1 |              | 2 | 2 |
|                        |    | 2 |              | 2 | 2 |
| 21 wpi 10 <sup>5</sup> | 9  | 1 | WT           | 2 | 2 |
|                        |    | 2 |              | 2 | 2 |
|                        |    | 3 |              | 2 | 2 |
|                        | 10 | 1 |              | 3 | 3 |
|                        |    | 2 |              | 3 | 3 |
|                        |    | 3 |              | 3 | 3 |
|                        | 11 | 1 |              | 2 | 3 |
|                        |    | 2 |              | 3 | 3 |
|                        |    | 3 |              | 3 | 3 |
|                        | 12 | 1 |              | 0 | 0 |
|                        |    | 2 |              | 0 | 0 |
|                        |    | 3 |              | 0 | 0 |
|                        | 20 | 1 | B6.Sst1<br>S | 3 | 3 |
|                        |    | 2 |              | 3 | 3 |
|                        |    | 3 |              | 3 | 2 |
|                        | 21 | 1 |              | 3 | 2 |
|                        |    | 2 |              | 3 | 2 |
|                        |    | 3 |              | 3 | 2 |
|                        | 22 | 1 |              | 3 | 2 |
|                        |    | 2 |              | 3 | 3 |

**Supplemental Table S4. Optimized conditions for manual fmIHC (5-plex)**

| Order | AR Conditions | Rabbit derived primary antibody (Ab) | Manufacturer Catalog # | Primary Ab titration | Primary Ab incubation length | TSA-conjugated Fluorophore | Manufacturer Catalog # | Opal Titration |
|-------|---------------|--------------------------------------|------------------------|----------------------|------------------------------|----------------------------|------------------------|----------------|
|-------|---------------|--------------------------------------|------------------------|----------------------|------------------------------|----------------------------|------------------------|----------------|

|   |                                          |                                        |                             |       |                             |     |                                 |        |
|---|------------------------------------------|----------------------------------------|-----------------------------|-------|-----------------------------|-----|---------------------------------|--------|
| 1 | 90 degrees for 15min                     | Arginase-1 (Arg1)                      | Cell Signaling D4E3M        | 1:100 | 1 hour at room temperature  | 570 | Akoya Biosciences, FP148800 1KT | 1:100  |
| 2 | 90 degrees C for 15min                   | Inducible nitric oxide synthase (iNOS) | abcam ab15323               | 1:200 | Overnight at 4 degrees C    | 480 | Akoya Biosciences, FP150000 1KT | 1:200  |
| 3 | 95 degrees C for 40 minutes & AR9 buffer | CD68                                   | Fisher Scientific PA5-32330 | 1:100 | Overnight at 4 degrees C    | 620 | Akoya Biosciences, FP149500 1KT | 1:100  |
| 4 | 95 degrees C for 40 minutes              | CD3e                                   | ThermoFisher MA5-14524      | 1:100 | 3 hours at room temperature | 520 | Akoya Biosciences, FP148700 1KT | 1:200  |
| 5 | 90 degrees for 15min                     | Mycobacterium tuberculosis             | Biocare Medical CP140A      | 1:200 | 1 hour at room temperature  | 780 | Akoya Biosciences, FP150100 1KT | 1:12.5 |

**Supplemental Table S5. Optimized conditions for automated fmIHC (6-plex)**

| Order | Pre-Treatment-duration | Rabbit derived primary antibody (Ab) | Manufacturer, Catalog # | Primary Ab titration | Primary Ab incubation length and temperature | TSA-conjugated Fluorophore | Manufacturer Catalog # | Opal Titration |
|-------|------------------------|--------------------------------------|-------------------------|----------------------|----------------------------------------------|----------------------------|------------------------|----------------|
|-------|------------------------|--------------------------------------|-------------------------|----------------------|----------------------------------------------|----------------------------|------------------------|----------------|

|   |                   |                                        |                                 |       |              |     |                                 |       |
|---|-------------------|----------------------------------------|---------------------------------|-------|--------------|-----|---------------------------------|-------|
| 1 | CC1-95-64 minutes | Arginase-1 (Arg1)                      | Cell Signaling Technology D4E3M | 1:100 | 24 min 37° C | 570 | Akoya Biosciences, FP14880 01KT | 1:100 |
| 2 | CC1-95-64 minutes | Inducible nitric oxide synthase (iNOS) | Abcam ab15323                   | 1:200 | 32 min 37° C | 480 | Akoya Biosciences, FP15000 01KT | 1:100 |
| 3 | CC1-95-32 minutes | CD68                                   | Abcam ab12512                   | 1:100 | 60 min 37° C | 690 | Akoya Biosciences, FP14970 01KT | 1:100 |
| 4 | CC2-95-64 minutes | CD4                                    | Cell Signaling Technology 25229 | 1:50  | 60 min 37° C | 620 | Akoya Biosciences, FP14950 01KT | 1:100 |
| 5 | CC1-95-64 minutes | CD3e                                   | Thermo Fisher MA5-14524         | 1:100 | 60 min 37° C | 520 | Akoya Biosciences, FP14870 01KT | 1:100 |
| 6 | CC1-95-64 minutes | Mycobacterium tuberculosis             | Biocare Medical CP140A          | 1:100 | 60 min 37° C | 780 | Akoya Biosciences, FP15010 01KT | 1:25  |

**Supplemental Table S6. Optimized conditions for automated YFP fmlHC (5-plex)**

| Order | Pre-Treatment-duration | Rabbit derived primary antibody (Ab) | Manufacturer Catalog # | Primary Ab titration | Primary Ab incubation length | TSA-conjugated Fluorophore | Manufacturer Catalog # | Opal Titration |
|-------|------------------------|--------------------------------------|------------------------|----------------------|------------------------------|----------------------------|------------------------|----------------|
|-------|------------------------|--------------------------------------|------------------------|----------------------|------------------------------|----------------------------|------------------------|----------------|

|   |                   |                                        |                                 |       |              |     |                                 |       |
|---|-------------------|----------------------------------------|---------------------------------|-------|--------------|-----|---------------------------------|-------|
| 1 | CC1-95-64 minutes | Arginase-1 (Arg1)                      | Cell Signaling Technology D4E3M | 1:100 | 24 min 37° C | 520 | Akoya Biosciences, FP1487001 KT | 1:200 |
| 2 | CC1-95-64 minutes | Mycobacterium tuberculosis             | Biocare Medical CP140A          | 1:100 | 60 min 37° C | 570 | Akoya Biosciences, FP1488001 KT | 1:125 |
| 3 | CC1-95-64 minutes | GFP                                    | Invitrogen A11122               | 1:100 | 24 min 37° C | 480 | Akoya Biosciences, FP1500001 KT | 1:250 |
| 4 | CC1-95-64 minutes | Inducible nitric oxide synthase (iNOS) | Abcam ab15323                   | 1:200 | 32 min 37° C | 690 | Akoya Biosciences, FP1497001 KT | 1:75  |
| 5 | CC1-95-64 minutes | CD3e                                   | Thermo Fisher MA5-14524         | 1:100 | 60 min 37° C | 620 | Akoya Biosciences, FP1495001 KT | 1:100 |
